# Supplementary material
Source: PubMed Central journal article supplement (PMC3348492)
Supplement: supp_glr208_Supplemental_material_Dammann_Sell_Begall_Strauch_Monnier_101311.pdf [file supp_glr208_Supplemental_material_Dammann_Sell_Begall_Strauch_Monnier_101311.pdf]

## Supplementary Material

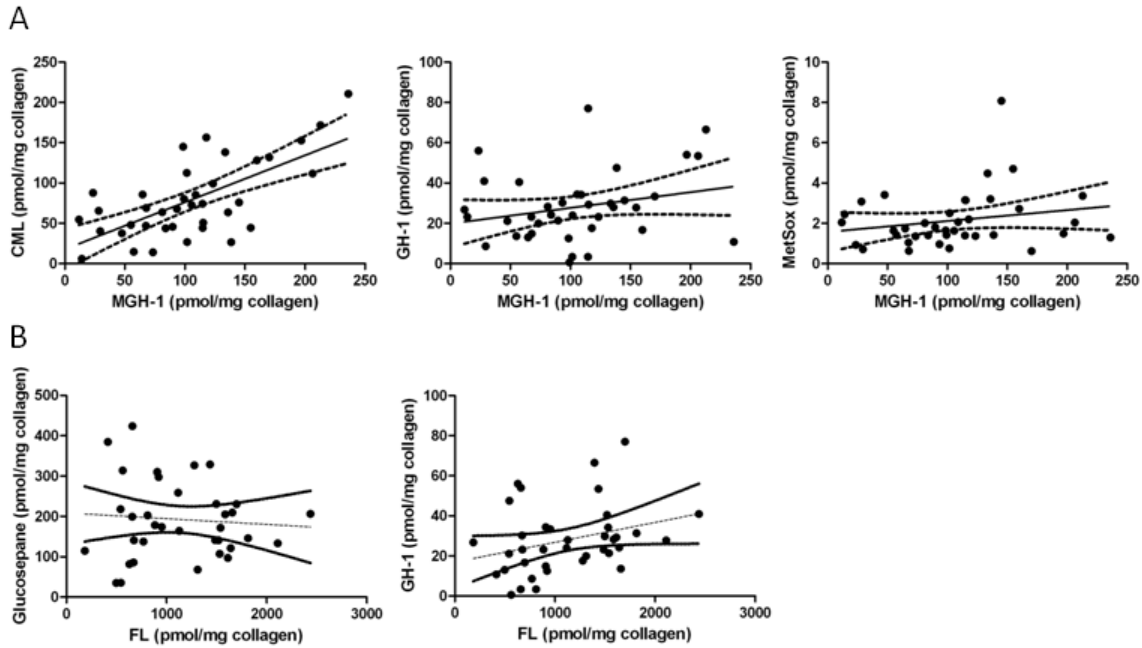

Figure S1: Partial correlations of different markers under investigation.

Depicted are (A) significant and (B) borderline nonsignificant partial correlations between markers of the Maillard reaction or protein oxidation after controlling for age, status and sex. Straight lines: significant relationships ( $p < 0.05$ ), dotted lines: borderline nonsignificant relationships ( $0.05 < p < 0.1$ ), curved lines: 95% confidence intervals. See methods and results sections for statistical details.
